# Supplementary material for: PTPRO-mediated autophagy prevents hepatosteatosis and tumorigenesis
Source: PubMed Central journal article supplement (PMC4496227; doi:10.18632/oncotarget.3353), 2015-03-20
Supplement: oncotarget-06-9420-s001.pdf [file oncotarget-06-9420-s001.pdf]

SUPPLEMENTARY FIGURES AND TABLE

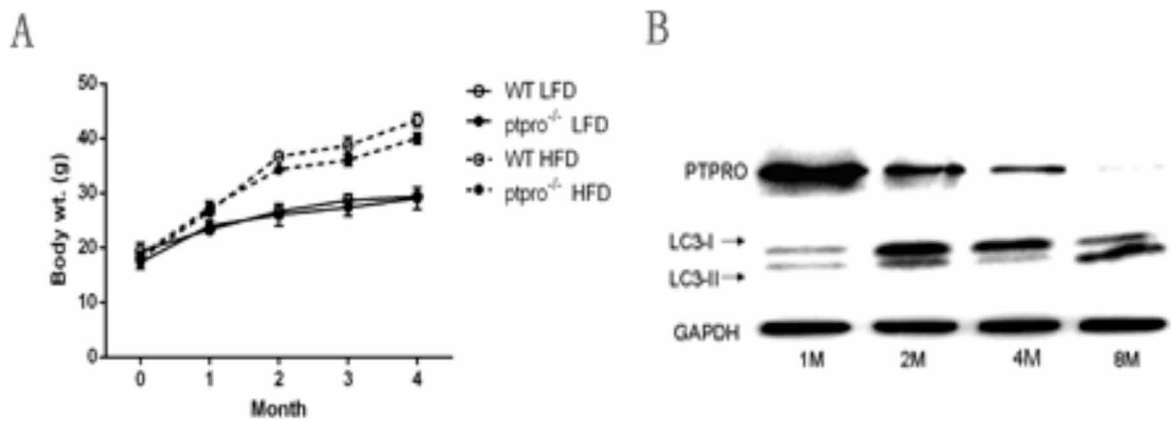

**Supplementary Figure S1:** (A) Body weight gain during NASH development in WT and ptpro<sup>-/-</sup> male mice kept on LFD or HFD after DEN administration (n = 6 per group). (B) Mice were feeding HFD, then liver tissues were collected at 1M (month), 2M, 4M, 8M and the protein levels of PTPRO, LC3I/II were analysis by Western-blot.

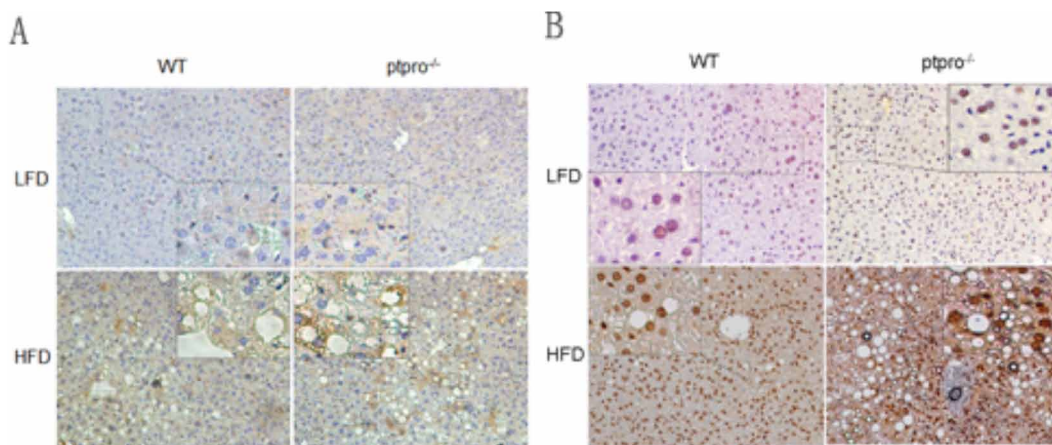

**Supplementary Figure S2:** (A) Representative figures for IHC staining of p-AKT (S473) in LFD or HFD treated liver of WT and ptpro<sup>-/-</sup> mice. (B) Representative figures for IHC staining of p-MDM4 in LFD or HFD treated liver of WT and ptpro<sup>-/-</sup> mice.

Supplementary Table S1: Primer sequences for amplification of target genes

| Gene    | Forward                 | Reverse                |
|---------|-------------------------|------------------------|
| Dgat1   | CTGATCCTGAGTAATGCAAGGTT | TGGATGCAATAATCACGCATGG |
| Pparg   | TCTCCATCACGGAGAGGTC     | GATGCACTGCCTATGAGCAC   |
| Srebp1c | CTTTGGCCTCGCTTTTCGG     | TGGGTCCAATTAGAGCCATCTC |
| Acox1   | TAACTTCCTCACTCGAAGCCA   | AGTTCCATGACCCATCTCTGTC |
| Hmgs2   | GAAGAGAGCGATGCAGGAAAC   | GTCCACATATTGGGCTGGAAA  |
| Cpt1    | AGTGGCCTCACAGACTCCA     | GCCCATGTTGTACAGCTTCC   |
| Gapdh   | GCTGGTCATCAACGGGAAA     | ACGCCAGTAGACTCCACGACA  |
